# Supplementary material for: Achieving selective photocatalytic CO2 reduction to CO on bismuth tantalum oxyhalogen nanoplates
Source: Royal Society of Chemistry journal article supplement (doi:10.1039/d1ta02504j), 2021-01-01
Supplement: d1ta02504j1.pdf [file d1ta02504j1.pdf]

## Supporting Information

### **Achieving Selective Photocatalytic CO<sub>2</sub> Reduction to CO on Bismuth Tantalum Oxyhalogen Nanoplates**

Xiaoping Tao<sup>a</sup>, Yi Wang<sup>a</sup>, Jiangshan Qu, Yue Zhao, Rengui Li\*, Can Li\*

*1. State Key Laboratory of Catalysis, Dalian Institute of Chemical Physics,  
Chinese Academy of Sciences, Dalian National Laboratory for Clean Energy,  
Zhongshan Road 457, Dalian, 116023, China.*

*2. University of Chinese Academy of Sciences, China.*

*Correspondence and requests for materials should be addressed to Rengui Li  
(email: [rgli@dicp.ac.cn](mailto:rgli@dicp.ac.cn)) or Can Li (email: [canli@dicp.ac.cn](mailto:canli@dicp.ac.cn)).*

## **Experimental Section:**

### **1. Sample preparation**

$\text{Bi}_4\text{TaO}_8\text{X}$  ( $\text{X}=\text{Cl}, \text{Br}$ ) was synthesized through two methods, solid state reaction and flux-treated method according to the previous literature.<sup>1</sup> For the solid state method, stoichiometric quantities of  $\text{Bi}_2\text{O}_3$ ,  $\text{BiOX}$  ( $\text{X}=\text{Cl}, \text{Br}$ ) and  $\text{Ta}_2\text{O}_5$  were mixed, grounded and heated in an evacuated silica tube at 973 K for 14h. For the flux-treated  $\text{Bi}_4\text{TaO}_8\text{X}$  ( $\text{X}=\text{Cl}, \text{Br}$ ), stoichiometric quantities of  $\text{Bi}_2\text{O}_3$ ,  $\text{BiOX}$  ( $\text{X}=\text{Cl}, \text{Br}$ ) and  $\text{Ta}_2\text{O}_5$  with NaCl and KCl (molar ratio of NaCl / KCl is 1:1), acting as flux agents, was mixed and followed with heating in air at 973 K for 14h. The cooled mixture was washed with deionized water for several times and dried at 353 K for 5 h.  $\text{BiOCl}$  and  $\text{BiOBr}$  was prepared via a facial one-pot process as in previous reports.<sup>2</sup>

Different cocatalysts were loaded by in situ reduction using  $\text{NaBH}_4$  as the reductive agent. Typically, a calculated amount of precursors aqueous solution was added to the aqueous suspension of photocatalyst powders (100 mg), followed with a drop wise adding of 3 mL  $\text{NaBH}_4$  fresh aqueous solution (0.1 mg/mL). After stirring for 30 minutes, the sample was centrifuged and washed with deionized water for several times and dried at 353 K in a vacuum oven for 5 h.

The  $\text{Bi}_4\text{TaO}_8\text{X}$  ( $\text{X}=\text{Cl}, \text{Br}$ ) and  $\text{Bi}_4\text{TaO}_8\text{X-F}$  ( $\text{X}=\text{Cl}, \text{Br}$ ) film electrodes were prepared by electrophoretic deposition (EPD) on FTO substrate. Typically, the EPD was carried out in an acetone solution (50 mL) containing the powder sample (50 mg) and iodine (20 mg), before which the suspension was dispersed by continuous sonication for 20 min. The FTO electrode was immersed, paralleling with another FTO electrode, and the distance between these two electrodes was 5 cm. 20 V and 1 A were applied for 1 min using a potentiostat (ITECH IT6834), and then the prepared electrodes were calcined in air at 673 K for 1 h. The area of the electrode was fixed at  $0.25 \text{ cm}^2$  by insulating cement.

### **2. Characterization of photocatalysts**

The as-prepared samples were characterized by X-ray power diffraction (XRD) on a Rigaku D/Max-2500/PC powder diffractometer. Each sample powder was scanned using Cu-K $\alpha$  radiation with an operating voltage of 40 kV. The scan rate of 5°/min was applied to record the XRD patterns in the range of 20-60° at a step size of 0.02°. UV-visible (UV-vis) diffuse reflectance spectra were recorded on a UV-vis spectrophotometer (JASCO V-550) equipped with an integrating sphere, scanning range, 200-800 nm, scanning rate, 200 nm/min. The morphologies and elemental compositions were examined by scanning electron microscopy (SEM, Quanta 200 FEG, FEI) with energy dispersive X-ray spectroscopy (EDX) and high resolution transmission electron microscopy (HRTEM, JEOL JEM-2000EX). X-ray photoelectron spectroscopy (XPS) measurements were conducted on a VG ESCALAB MK2 spectrometer with monochromatized Al-K $\alpha$  excitation. Raman spectra were collected using 532 nm and 405 nm diode-pumped solid-state laser (Changchun New Industries Optoelectronics Technology Co., Ltd.) and a commercial Raman spectrometer (Invia, Renishaw plc.). The typical spectrum collection time was 5 s. The fluorescence spectra were measured with excitation laser beam at 405 nm output wavelength and 50-ps pulse width (Time-Tech Spectra, TPL200). In situ IR absorption experiment was carried out on a Nicolet 470 FT-IR spectrometer equipped with a homemade quartz cell and MCT (HgCdTe) detector. Ag-Bi<sub>4</sub>TaO<sub>8</sub>Br-F and Bi<sub>4</sub>TaO<sub>8</sub>Br were pressed into wafer and equipped in the middle of the cell. Ar and CO<sub>2</sub> through water were purged into the cell until reaching the saturation adsorption. A 300 W Xe lamp (Ushio-CERMAX LX300) equipped with optical fiber was chosen as the light source. The spectra was collected with a time period of 10 min.

### **3. Photocatalytic reactions**

Photocatalytic CO<sub>2</sub> reduction was carried out in a homemade quartz reactor. 0.05 g photocatalyst was dispersed uniformly in a 5 mL saturated KHCO<sub>3</sub> solution. High purity CO<sub>2</sub> (99.999% Guangming Special Gas) was purged into the gastight reactor for 30min before the reaction. A 300 W Xe lamp (Ushio-CERMAX LX300) equipped with an optical cutoff filter (kenko, L42;  $\lambda \geq 420$

nm) was used as the light source. The gas product was withdrawn with a syringe and analyzed by GC (Tianmei, 7900, 5A molecular sieve column with methane reformer and FID detector). For  $^{13}\text{CO}_2$  labeling experiment, the reactor was purged by 99 %  $^{13}\text{CO}_2$  through deionized water, with the other experiments conditions same.

The photocatalytic  $\text{O}_2$  evolution reactions were carried out in a closed gas circulation and evacuation system using a 300 W Xe lamp (Ushio-CERMAX LX300). The photocatalyst (0.05 g) was dispersed in a 5 mL saturated  $\text{KHCO}_3$  solution in a pyrex reaction cell and thoroughly degassed by evacuation in order to drive off the air inside. 50 mL  $\text{CO}_2$  gas were injected into the system then and the amount of evolved  $\text{O}_2$  was determined by an on-line gas chromatograph (Agilent GC7900C, TCD, Ar carrier).

The photocatalytic conversion of  $\text{Fe}^{3+}$  on  $\text{Bi}_4\text{TaO}_8\text{Br}$  and  $\text{Bi}_4\text{TaO}_8\text{Br-F}$  were carried out in an open system using a 300 W Xe lamp (Ushio-CERMAX LX300) equipped with an optical cutoff filter (kenko, L42;  $\lambda \geq 420$  nm) as the light source. The photocatalyst (0.1 g) was dispersed in an aqueous 100 mL  $\text{Fe}(\text{NO}_3)_3$  solution (5.0 mM) with and without methanol (10 vol%). Quantitative analysis of  $\text{Fe}^{2+}$  is conducted by a phenanthroline method. The solution after reaction was diluted that the concentration of  $\text{Fe}^{2+}$  is less than 1.0 mM. Then 1.0 mL diluted solution was mixed with 4.0 mL 0.2 M NaAc-HAc buffer solution (pH=4.0) and 3.0 mL 0.1 wt% 1, 10-phenanthroline solution (50 vol% ethanol solution). The UV-Vis absorption spectrum was measured. Then the concentration of  $\text{Fe}^{2+}$  was estimated based on the absorbance at 510 nm using a calibration curve.

#### **4. Photoelectrocatalytic and electrochemical measurements**

The photoelectrochemical performances of the  $\text{Bi}_4\text{TaO}_8\text{X}$  (X=Cl, Br) and  $\text{Bi}_4\text{TaO}_8\text{X-F}$  (X=Cl, Br) film electrodes were measured in a three-electrodes setup, where Pt electrode and saturated mercury electrode (SCE) were employed as counter and reference electrode, respectively, and 0.50 M  $\text{Na}_2\text{SO}_4$  with or without 0.10 M  $\text{Na}_2\text{SO}_3$  solution were used as the electrolyte solution. For linear sweep voltammetry, the potential was swept at a scanning rate of 10 mV/s. A shutter was used to

record both the dark and photocurrent during a single scan. A 300 W Xe lamp (Ushio-CERMAX LX300) equipped with an optical cutoff filter (kenko, L42;  $\lambda \geq 420$  nm) was used as the light source. The charge separation efficiencies of Bi<sub>4</sub>TaO<sub>8</sub>Br and Bi<sub>4</sub>TaO<sub>8</sub>Br-F were tested by photoelectrocatalytic measurement with or without Na<sub>2</sub>SO<sub>3</sub>. Given that  $\eta_{inj}$  of the photoanode in a hole scavenger approaches 100%, the  $\eta_{sep}$  and  $\eta_{inj}$  can be estimated by  $\eta_{inj} = j_{water}/j_{sulfite}$  and  $\eta_{sep} = j_{sulfite}/j_{abs}$ , respectively, where  $j_{abs}$  is the theoretical maximum photocurrent density determined by the light absorption as shown in Fig. S4. In order to calculate  $J_{max}$  (maximum photocurrent density) of Bi<sub>4</sub>TaO<sub>8</sub>Br with a band gap energy of 2.6 eV obtained from Tauc plot, the solar spectral irradiance at AM 1.5G (radiation energy (W·m<sup>-2</sup>·nm<sup>-1</sup>) vs. wavelength (nm)) was converted to the solar energy spectrum in terms of number of photons (s<sup>-1</sup>·m<sup>-2</sup>·nm<sup>-1</sup>) vs. wavelength (nm). Then, the number of photons above the band gap energy of the Bi<sub>4</sub>TaO<sub>8</sub>Br ( $E_g = 2.6$  eV) was calculated using a trapezoidal integration (in 10 nm increments) of the spectrum and was converted to the current density (mA·cm<sup>-2</sup>). In order to calculate  $J_{abs}$  (photocurrent assuming 100% APCE), the light harvesting efficiency (LHE) at each wavelength was multiplied during each step of the trapezoidal integration. Using these calculations,  $J_{max} = 4.74$  mA/cm<sup>2</sup> and  $J_{abs} = 3.87$  mA/cm<sup>2</sup> were obtained.

Electrochemical impedance spectroscopy (EIS) was carried out at the potential of 1.60 V vs. RHE, with an AC potential frequency range from 0.1 Hz to 100 kHz on a PARSTAT 2273 workstation (Princeton Applied Research) at room temperature under the irradiation of a 300 W Xe lamp (Ushio-CERMAX LX300) equipped with an optical cutoff filter (kenko, L42;  $\lambda \geq 420$  nm).

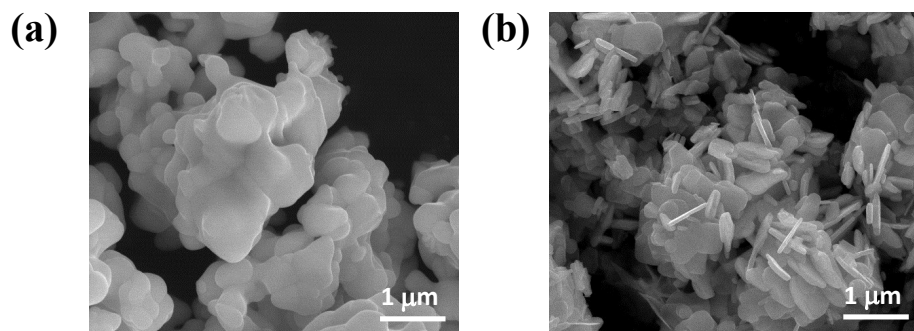

Figure S1. SEM images of Bi<sub>4</sub>TaO<sub>8</sub>Br (a) and Bi<sub>4</sub>TaO<sub>8</sub>Br-F (b).

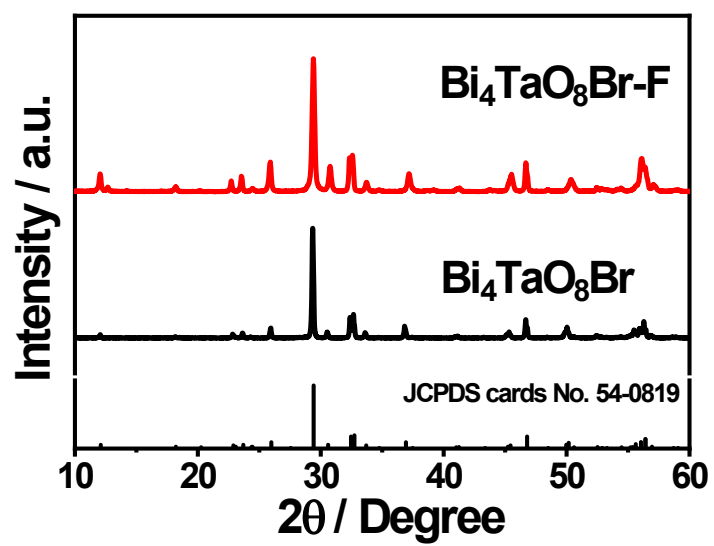

Figure S2. XRD patterns of  $\text{Bi}_4\text{TaO}_8\text{Br}$  and  $\text{Bi}_4\text{TaO}_8\text{Br-F}$ .

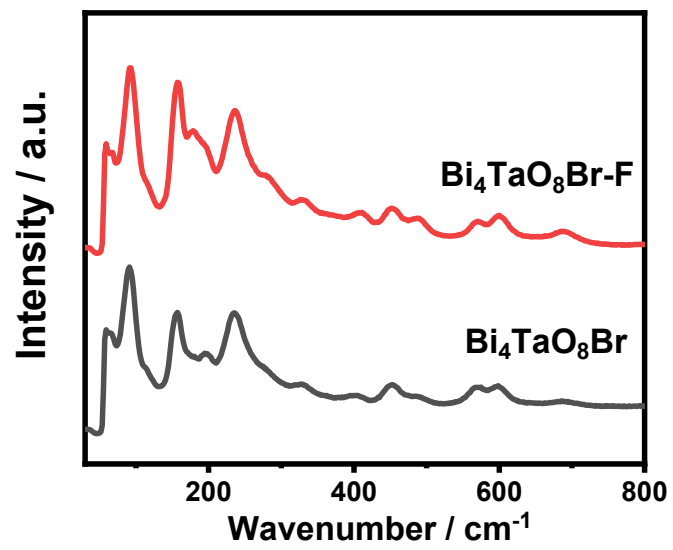

Figure S3. Raman spectra of  $\text{Bi}_4\text{TaO}_8\text{Br}$  and  $\text{Bi}_4\text{TaO}_8\text{Br-F}$ .



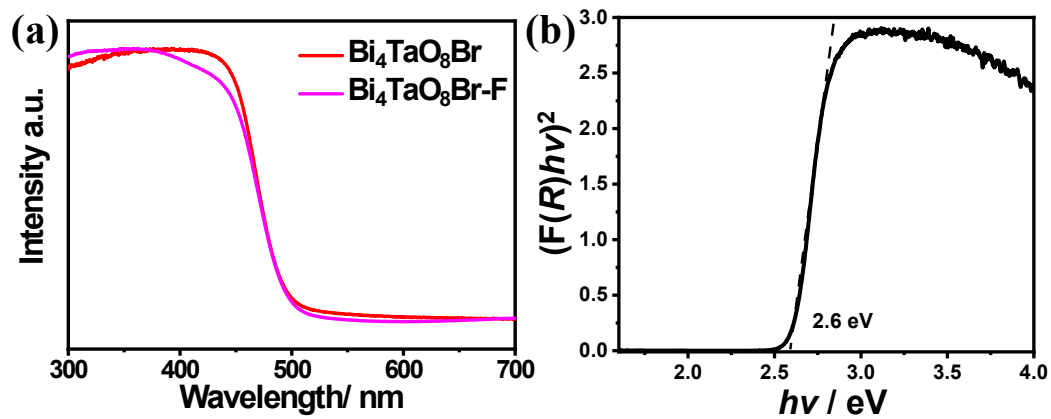

Figure S4. (a) UV-visible absorption spectra of  $\text{Bi}_4\text{TaO}_8\text{Br}$  and  $\text{Bi}_4\text{TaO}_8\text{Br-F}$ . (b) Tauc plot of  $\text{Bi}_4\text{TaO}_8\text{Br}$ .

Figure S5. Fitting results of EIS measurements of  $\text{Bi}_4\text{TaO}_8\text{Br}$  and  $\text{Bi}_4\text{TaO}_8\text{Br-F}$ .

|                                                        | $R_s$ | $R_{sc}$ | $R_{ct}$ |
|--------------------------------------------------------|-------|----------|----------|
| <b><math>\text{Bi}_4\text{TaO}_8\text{Br}</math></b>   | 7.9   | 38705    | 315550   |
| <b><math>\text{Bi}_4\text{TaO}_8\text{Br-F}</math></b> | 7.6   | 16293    | 137820   |

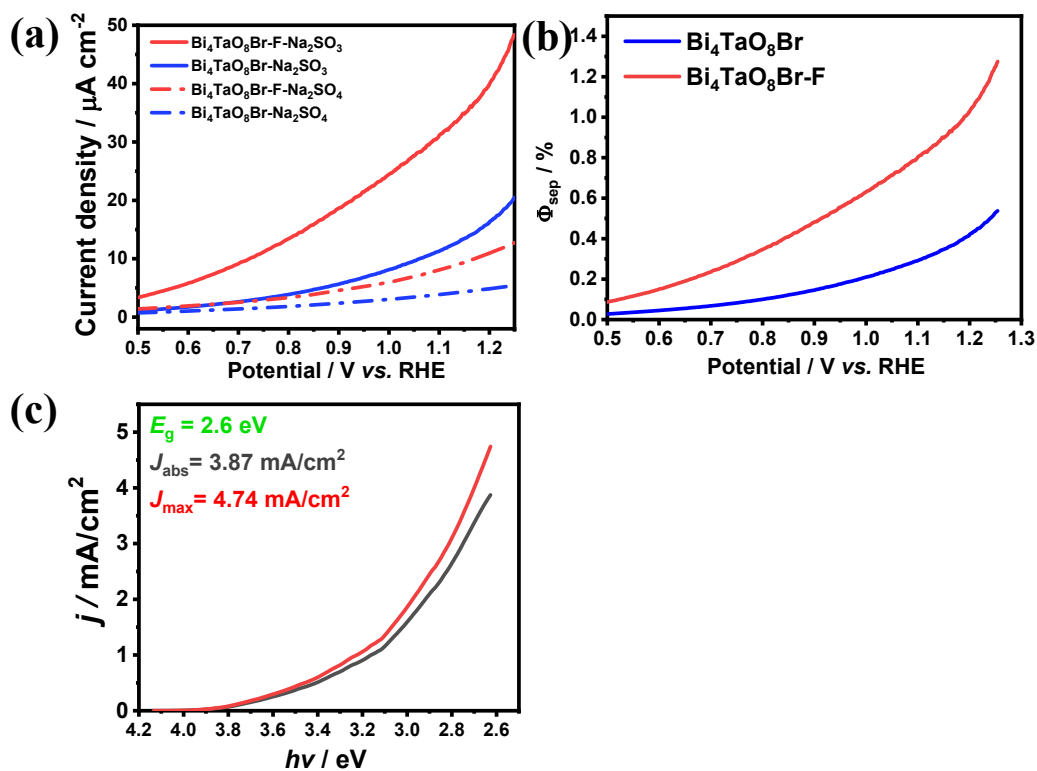

Figure S6. (a) Photoelectrocatalytic current density of Bi<sub>4</sub>TaO<sub>8</sub>Br and Bi<sub>4</sub>TaO<sub>8</sub>Br-F in the presence and absence of Na<sub>2</sub>SO<sub>3</sub>. (b)  $\Phi_{\text{sp}}$  calculated from the J-V plots for Bi<sub>4</sub>TaO<sub>8</sub>Br and Bi<sub>4</sub>TaO<sub>8</sub>Br-F. A 0.50 M Na<sub>2</sub>SO<sub>4</sub> solution containing 0.10 M Na<sub>2</sub>SO<sub>3</sub> was used as the electrolyte. (c)  $J_{\text{abs}}$  and  $J_{\text{max}}$  of Bi<sub>4</sub>TaO<sub>8</sub>Br along the band gap.

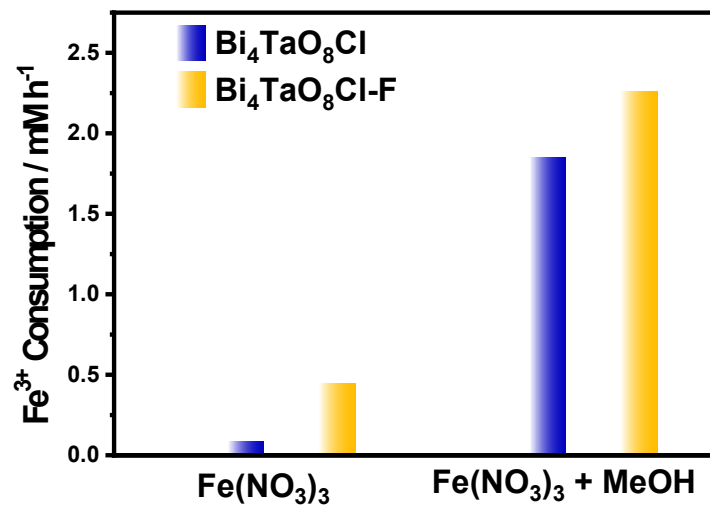

Figure S7. Photocatalytic reaction on Bi<sub>4</sub>TaO<sub>8</sub>Cl and Bi<sub>4</sub>TaO<sub>8</sub>Cl-F in the presence of Fe(NO<sub>3</sub>)<sub>3</sub> and CH<sub>3</sub>OH.

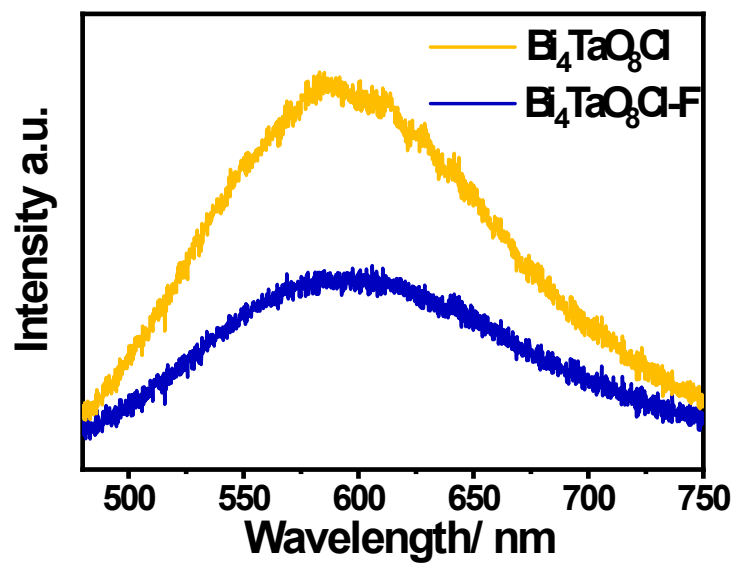

Figure S8. Steady photoluminescence (PL) spectra of  $\text{Bi}_4\text{TaO}_8\text{Cl}$  and  $\text{Bi}_4\text{TaO}_8\text{Cl-F}$  under room temperature.

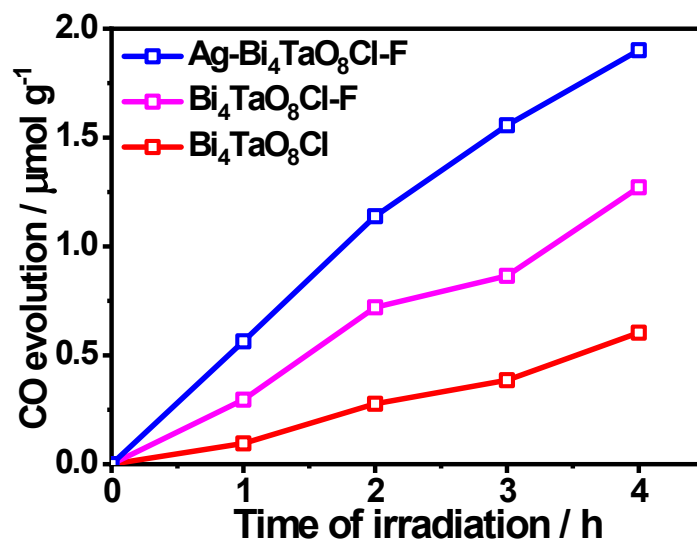

Figure S9. Time courses of photocatalytic CO<sub>2</sub> reduction on Bi<sub>4</sub>TaO<sub>8</sub>Cl, Bi<sub>4</sub>TaO<sub>8</sub>Cl-F and Ag loaded Bi<sub>4</sub>TaO<sub>8</sub>Cl-F in the saturated KHCO<sub>3</sub> solution under visible light irradiation.

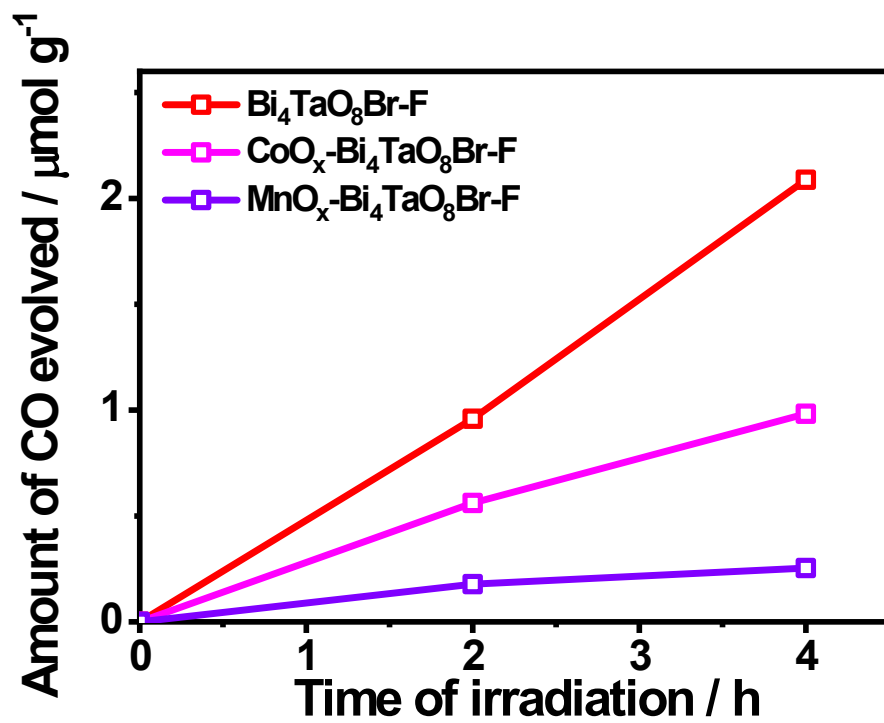

Figure S10. Time course of photocatalytic  $\text{CO}_2$  reduction on  $\text{Bi}_4\text{TaO}_8\text{Br-F}$  loaded with  $\text{CoO}_x$  and  $\text{MnO}_x$ .

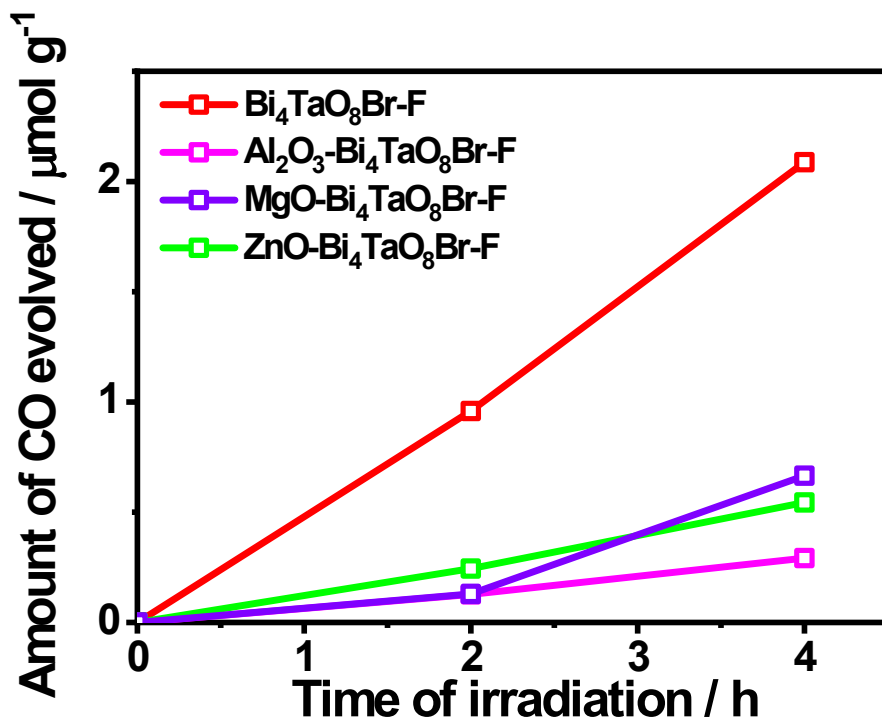

Figure S11. Time course of photocatalytic  $\text{CO}_2$  reduction on  $\text{Bi}_4\text{TaO}_8\text{Br-F}$  loaded with  $\text{Al}_2\text{O}_3$ ,  $\text{MgO}$ , and  $\text{ZnO}$ .



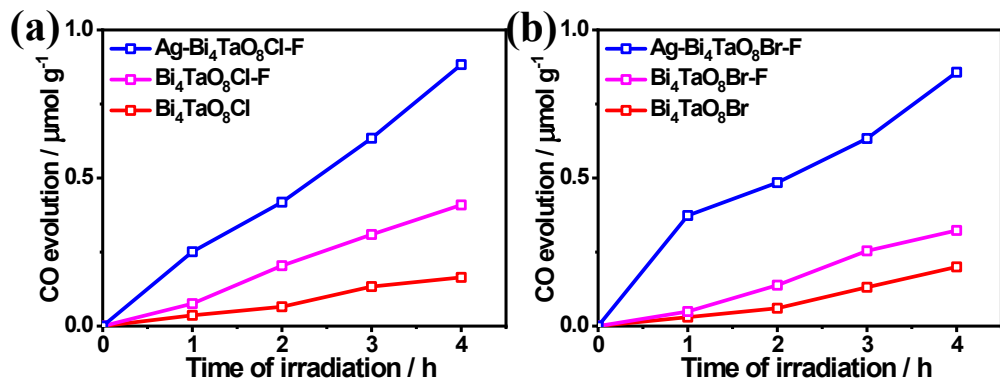

Figure S12. Time courses of photocatalytic CO<sub>2</sub> reduction on Bi<sub>4</sub>TaO<sub>8</sub>X, Bi<sub>4</sub>TaO<sub>8</sub>X-F and Ag loaded Bi<sub>4</sub>TaO<sub>8</sub>X-F (X=Cl, Br) under visible light irradiation.

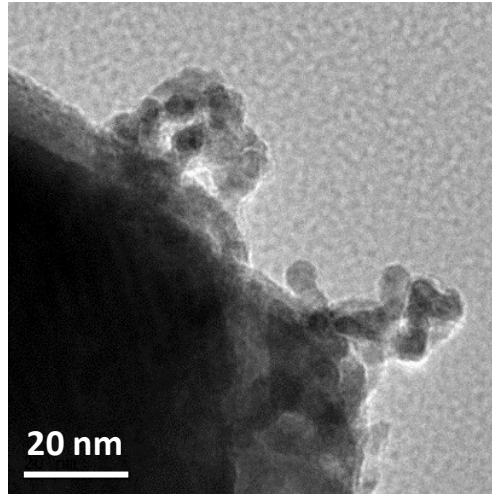

Figure S13. TEM image of Ag nanoparticles loaded on  $\text{Bi}_4\text{TaO}_8\text{Br-F}$ .

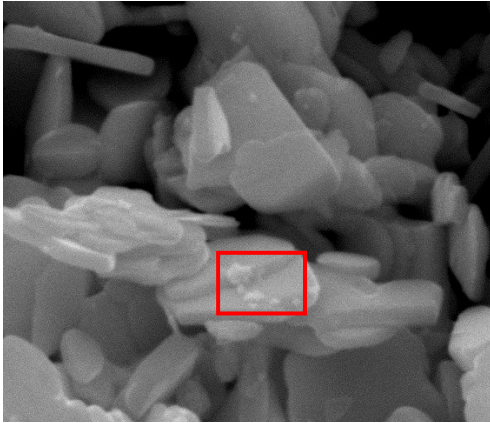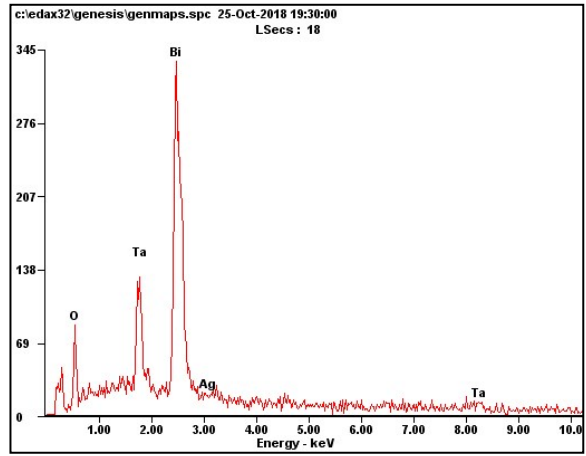

| Element    | Wt%   | At%   |
|------------|-------|-------|
| <b>OK</b>  | 22.78 | 75.45 |
| <b>AgL</b> | 03.58 | 01.76 |
| <b>TaL</b> | 26.10 | 07.64 |
| <b>BiL</b> | 39.98 | 10.14 |
| <b>BrK</b> | 07.57 | 05.02 |

Figure S14. SEM image and corresponding EDX of Ag nanoparticles on Bi<sub>4</sub>TaO<sub>8</sub>Br-F.

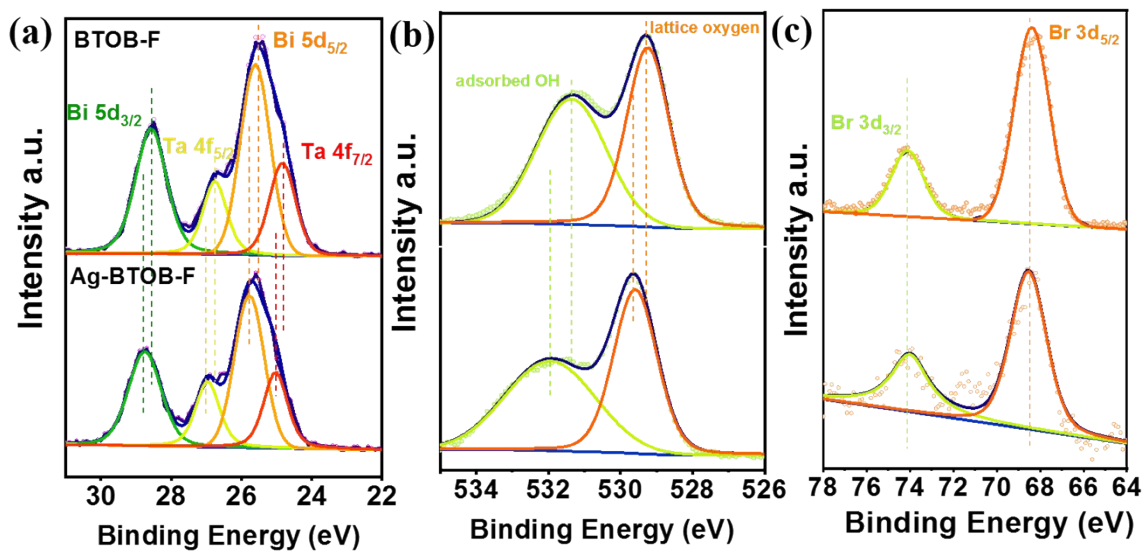

Figure S15. XPS of  $\text{Bi}_4\text{TaO}_8\text{Br}$  and  $\text{Bi}_4\text{TaO}_8\text{Br-F}$ . (a) Bi 5d and Ta 4f, (b) O 1s, (c) Br 3d.

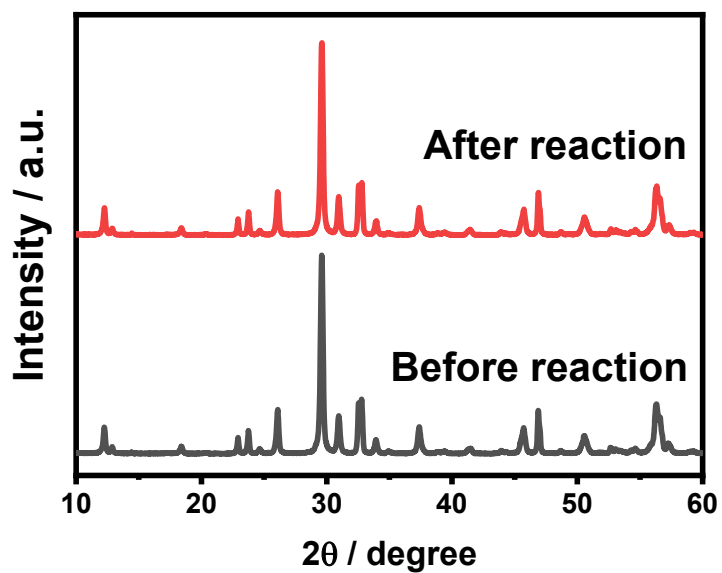

Figure S16. XRD patterns of Ag-Bi<sub>4</sub>TaO<sub>8</sub>Br-F before and after cycling reaction.

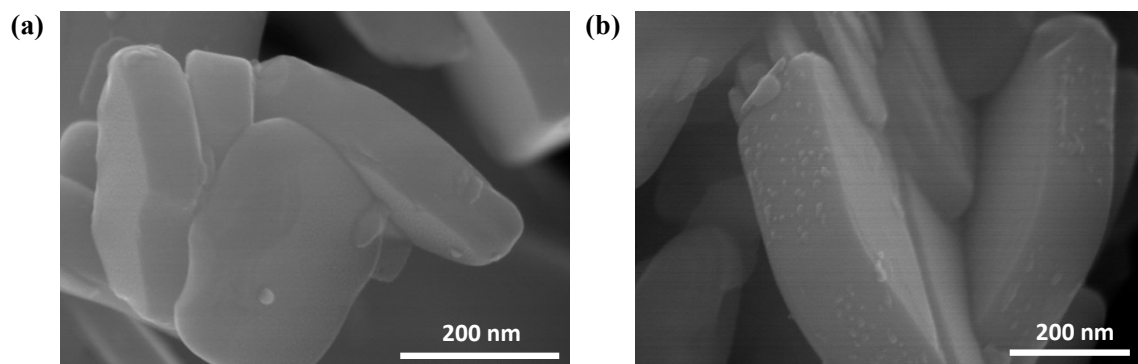

Figure S17. SEM of Ag-Bi<sub>4</sub>TaO<sub>8</sub>Br-F before and after cycling reaction.

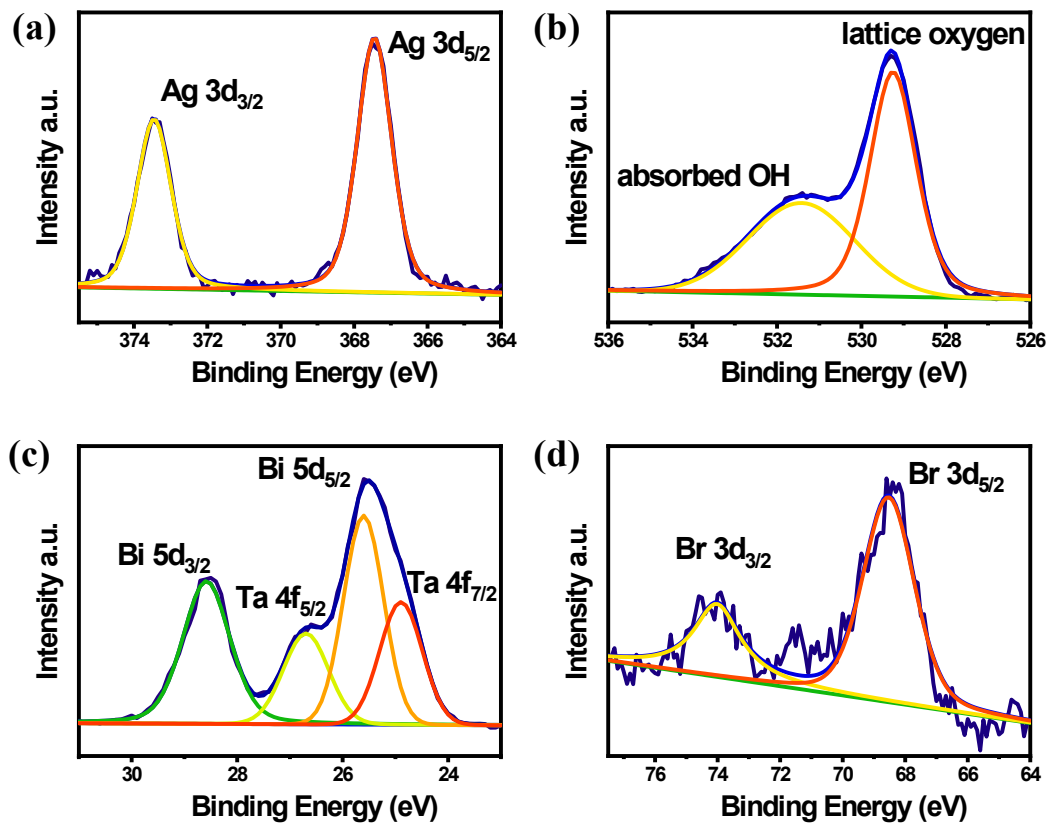

Figure S18. XPS of Ag-Bi<sub>4</sub>TaO<sub>8</sub>Br-F after cycling reaction.

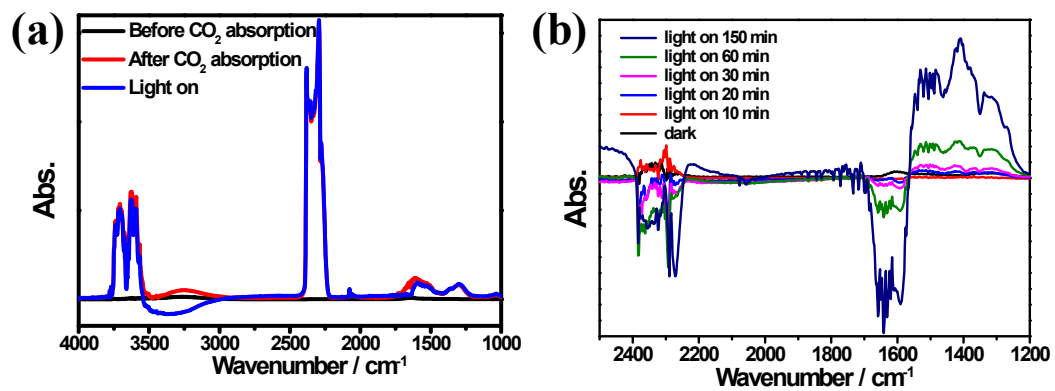

Figure S19. In situ FTIR of photocatalytic  $\text{CO}_2$  reduction on  $\text{Bi}_4\text{TaO}_8\text{Br-F}$  before and after  $\text{CO}_2$  absorption in dark and after irradiation for different times.



## References.

1. X. Tao, Y. Zhao, L. Mu, S. Wang, R. Li and C. Li, *Advanced Energy Materials*, 2018, **8**, 1701392.
2. X. Zhang, Z. Ai, F. Jia and L. Zhang, *The Journal of Physical Chemistry C*, 2008, **112**, 747.
